# Supplementary material for: Efficacy of three COVID-19 vaccine doses in lung transplant recipients: a multicentre cohort study
Source: PubMed Central journal article supplement — Eur Respir J. 2023 Jan 19;61(1):2200502. doi: 10.1183/13993003.00502-2022 (PMC9644237; doi:10.1183/13993003.00502-2022), 2023-01-19

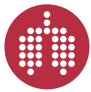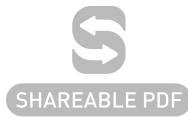

# Efficacy of three COVID-19 vaccine doses in lung transplant recipients: a multicentre cohort study

Gaëlle Dauriat<sup>1</sup>, Laurence Beaumont<sup>2,14</sup>, Liem Binh Luong Nguyen <sup>3,14</sup>, Benjamin Renaud Picard <sup>4</sup>, Morgane Penhouet<sup>5</sup>, Benjamin Coiffard<sup>6</sup>, Mathilde Salpin<sup>7</sup>, Xavier Demant<sup>8</sup>, Christel Saint Raymond<sup>9</sup>, Nicolas Carlier <sup>10</sup>, Jonathan Messika <sup>7</sup>, Martine Reynaud Gaubert<sup>6</sup>, Isabelle Danner<sup>5</sup>, Floriane Gallais <sup>11</sup>, Antoine Roux<sup>2</sup> and Jérôme Le Pavec<sup>1,12,13</sup>

<sup>1</sup>Service de Pneumologie et Transplantation Pulmonaire, Hôpital Marie Lannelongue, Groupe Hospitalier Paris-Saint Joseph, Le Plessis-Robinson, France. <sup>2</sup>Service de Transplantation Pulmonaire et Centre de Compétence de la Mucoviscidose, Hôpital Foch, Suresnes, France. <sup>3</sup>Inserm, CIC 1417, Hôpital Cochin, AP-HP, Paris, France. <sup>4</sup>Service de Pneumologie, Groupe de Transplantation Pulmonaire, Hôpitaux Universitaires de Strasbourg, Strasbourg, France. <sup>5</sup>Service de Pneumologie, Institut du Thorax, CHU Nantes, Nantes, France. <sup>6</sup>Service de Pneumologie et Equipe de Transplantation Pulmonaire, CHU Nord, AP-HM, Aix-Marseille Université, Marseille, France. <sup>7</sup>Service de Pneumologie, Hôpital Bichat, AP-HP, Paris, France. <sup>8</sup>Service de Pneumologie, Hôpital Haut-Lévêque, Université de Bordeaux, Pessac, France. <sup>9</sup>Clinique Universitaire de Pneumologie, Pôle Thorax et Vaisseaux, CHU Grenoble, INSERM1055, Université Grenoble Alpes, Grenoble, France. <sup>10</sup>Service de Pneumologie, Hôpital Cochin, AP-HP, APHP-CUP, Paris, France. <sup>11</sup>Laboratoire de Virologie, Hôpitaux Universitaires de Strasbourg, Strasbourg, France. <sup>12</sup>Faculté de Médecine, Université Paris-Saclay, Le Kremlin-Bicêtre, France. <sup>13</sup>INSERM UMR\_S 999, Hôpital Marie Lannelongue, Le Plessis-Robinson, France. <sup>14</sup>These authors contributed equally to this work.

Corresponding author: Jérôme Le Pavec ([lepavec@gmail.com](mailto:lepavec@gmail.com))

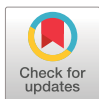

Shareable abstract (@ERSpublications)

Three mRNA COVID-19 vaccine doses rarely induced a serological response in lung transplant patients. COVID-19 was rare, suggesting cellular immunity and/or strong adherence to shielding measures. Other protective methods should be sought. <https://bit.ly/3pr9Wox>

**Cite this article as:** Dauriat G, Beaumont L, Luong Nguyen LB, *et al.* Efficacy of three COVID-19 vaccine doses in lung transplant recipients: a multicentre cohort study. *Eur Respir J* 2023; 61: 2200502 [DOI: 10.1183/13993003.00502-2022].

This single-page version can be shared freely online.

Copyright ©The authors 2023.

This version is distributed under the terms of the Creative Commons Attribution Non-Commercial Licence 4.0. For commercial reproduction rights and permissions contact [permissions@ersnet.org](mailto:permissions@ersnet.org)

This article has an editorial commentary: <https://doi.org/10.1183/13993003.01723-2022>

Received: 10 March 2022  
Accepted: 11 Aug 2022

## Abstract

**Question addressed by the study** Do three coronavirus disease 2019 (COVID-19) vaccine doses induce a serological response in lung transplant recipients?

**Methods** We retrospectively included 1071 adults (551 (52%) males) at nine transplant centres in France. Each had received three COVID-19 vaccine doses in 2021, after lung transplantation. An anti-spike protein IgG response, defined as a titre  $>264$  BAU·mL<sup>-1</sup> after the third dose (median (interquartile range (IQR)) 3.0 (1.7–4.1) months), was the primary outcome and adverse events were the secondary outcomes. Median (IQR) age at the first vaccine dose was 54 (40–63) years and median (IQR) time from transplantation to the first dose was 64 (30–110) months.

**Results** Median (IQR) follow-up after the first dose was 8.3 (6.7–9.3) months. A vaccine response developed in 173 (16%) patients. Factors independently associated with a response were younger age at vaccination, longer time from transplantation to vaccination and absence of corticosteroid or mycophenolate therapy. After vaccination, 51 (5%) patients (47 non-responders (47/898 (5%)) and four (4/173 (2%)) responders) experienced COVID-19, at a median (IQR) of 6.6 (5.1–7.3) months after the third dose. No responders had severe COVID-19 compared with 15 non-responders, including six who died of the disease.

**Conclusions** Few lung transplant recipients achieved a serological response to three COVID-19 vaccine doses, indicating a need for other protective measures. Older age and use of mycophenolate or corticosteroids were associated with absence of a response. The low incidence of COVID-19 might reflect vaccine protection *via* cellular immunity and/or good adherence to shielding measures.

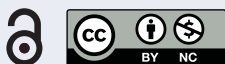

Supplement: ERJ-00502-2022.Shareable.pdf [file ERJ-00502-2022.Shareable.pdf]
